# Supplementary material for: A New Fuzzy-Evidential Controller for Stabilization of the Planar Inverted Pendulum System
Source: PLoS One. 2016 Aug 2;11(8):e0160416. doi: 10.1371/journal.pone.0160416 (PMC4970802; doi:10.1371/journal.pone.0160416)
Supplement: S1 Table — (XLSX) [file pone.0160416.s001.xlsx]

## Sheet: Sheet1
Displacement in X-axis	Displacement in Y-axis	Angle in X-axis	Angle in Y-axis	Control force in X axis	Control force in Y axis
0	0	0.122173	0.122173	29.4523	-27.7852
0.00029338	-0.000281929	0.121672	0.121641	20.4611	-19.922
0.0010982	-0.00106183	0.120294	0.120187	20.3876	-19.8545
0.00241261	-0.00233799	0.118039	0.117816	20.2676	-19.7441
0.00423361	-0.00410768	0.114911	0.114532	20.1015	-19.5909
0.00655706	-0.00636704	0.110914	0.110344	19.8897	-19.3952
0.00937766	-0.0091112	0.106055	0.105261	19.6325	-19.1573
0.012689	-0.0123342	0.100341	0.0992932	19.3307	-18.8775
0.0164835	-0.0160291	0.0937801	0.0924549	18.9848	-18.5562
0.0207525	-0.0201963	0.0863665	0.0847604	20.4592	-20.296
0.0255177	-0.0248623	0.0780447	0.0761659	19.2228	-19.1685
0.030771	-0.0300144	0.0688332	0.0666842	18.8499	-18.834
0.0364954	-0.0356372	0.0587548	0.0563438	17.5766	-18.4769
0.0426665	-0.0417152	0.047833	0.0451867	17.1668	-17.2867
0.0492665	-0.0482255	0.0361056	0.0332412	16.226	-16.8836
0.056274	-0.0551532	0.0235946	0.020541	15.3255	-15.657
0.063666	-0.0624741	0.0103408	0.00712163	13.9783	-14.3965
0.071366	-0.0701612	-0.00361021	-0.00688043	-17.4403	17.6219
0.0788053	-0.0776637	-0.0172097	-0.0203877	-22.7288	23.2491
0.0856716	-0.0846135	-0.0297591	-0.0328132	-26.0762	26.3277
0.0918783	-0.090893	-0.0410395	-0.0439992	-29.6256	30.5891
0.097348	-0.0964248	-0.0509097	-0.0538037	-31.0388	32.105
0.102068	-0.101207	-0.0593715	-0.062206	-35.6492	37.0068
0.106037	-0.105238	-0.0664308	-0.0692088	-36.6888	38.1163
0.109257	-0.10852	-0.072093	-0.0748141	-37.5326	39.0162
0.111727	-0.111052	-0.0763626	-0.0790228	-38.1661	39.6982
0.113447	-0.112834	-0.0792429	-0.0818356	-42.0106	40.1582
0.114416	-0.113866	-0.0807365	-0.0832529	-42.2239	44.0268
0.114636	-0.114147	-0.0808446	-0.0832746	-16.1431	14.726
0.114334	-0.113931	-0.0800448	-0.082337	-16.4648	15.0752
0.11362	-0.113347	-0.0785873	-0.080651	-16.3671	13.7609
0.112502	-0.11242	-0.076514	-0.0782314	-14.9095	13.6482
0.111007	-0.111152	-0.0738288	-0.0751259	-14.7295	13.5023
0.109143	-0.109546	-0.0705366	-0.0713527	-14.5108	13.3234
0.106917	-0.107607	-0.0666438	-0.066921	-14.2551	13.1132
0.104334	-0.10534	-0.062158	-0.0618414	-13.9655	12.8733
0.101402	-0.102752	-0.0570878	-0.0561257	-12.3437	12.6022
0.098151	-0.0998586	-0.0514623	-0.0498287	-11.9846	11.0862
0.0946003	-0.0966883	-0.0453313	-0.0429853	-11.6089	10.7733
0.0907596	-0.0932487	-0.0387066	-0.0356109	-11.1832	10.4147
0.086646	-0.0895489	-0.0316016	-0.0277343	-9.71798	9.28941
0.0822894	-0.0856124	-0.0240579	-0.0194095	-8.95702	8.4777
0.0777086	-0.0814628	-0.016117	-0.0106674	-7.18933	7.98621
0.0729374	-0.0771136	-0.00780097	-0.00156823	-6.67822	6.35049
0.0682768	-0.0725958	0.000834789	0.00731756	27.4876	-25.8818
0.0643109	-0.068463	0.0087343	0.0148775	31.864	-26.9876
0.0610867	-0.0650256	0.0153076	0.0210258	32.7524	-31.089
0.0586126	-0.0623382	0.0204534	0.0257499	33.896	-31.8093
0.0568885	-0.0604008	0.0241745	0.0290519	34.8766	-32.544
0.0559144	-0.0592134	0.026473	0.0309329	35.4352	-33.2053
0.0556903	-0.058776	0.0273502	0.0313937	14.0032	-34.1182
0.0559668	-0.0589606	0.0270511	0.0309115	16.0445	-15.9045
0.0566443	-0.059532	0.0260252	0.0296767	15.9483	-15.831
0.0577204	-0.0604991	0.0242551	0.0276934	15.7938	-15.7043
0.0591912	-0.0618587	0.0217459	0.0249681	15.5815	-15.5614
0.0610514	-0.0636074	0.0185028	0.0215098	15.3616	-15.4507
0.0632958	-0.0657423	0.0145297	0.0173269	15.2057	-15.3151
0.0659203	-0.0682601	0.00983089	0.0124255	15.023	-14.3791
0.0689132	-0.0711437	0.00443665	0.00682538	13.9673	-14.195
0.0722553	-0.0743822	-0.00163442	0.000560675	13.7338	17.3158
0.0756869	-0.0774457	-0.00737136	-0.00587516	-17.2936	18.2045
0.0786865	-0.0800543	-0.0122414	-0.0114875	-21.4298	22.4795
0.0811782	-0.0821306	-0.0160987	-0.0161342	-22.108	23.077
0.0831176	-0.0836304	-0.0188605	-0.0197319	-22.6331	23.5048
0.0844915	-0.0845429	-0.0205079	-0.0222571	-23.0016	23.76
0.0852902	-0.0848617	-0.0210296	-0.0236924	-23.3579	26.4912
0.0855056	-0.0847744	-0.0207846	-0.0240228	-8.63578	7.54614
0.0853818	-0.0844899	-0.0201724	-0.0237155	-9.2568	8.1999
0.0850322	-0.0840004	-0.0191777	-0.0229873	-9.17323	8.14749
0.0844532	-0.0833072	-0.0178025	-0.021831	-9.09305	8.07503
0.0836469	-0.0824122	-0.0160497	-0.0202503	-9.00425	7.98267
0.0826156	-0.0813177	-0.0139228	-0.0182485	-8.89181	7.8706
0.081362	-0.0800265	-0.0114261	-0.0158302	-8.75597	7.73904
0.0798896	-0.0785518	-0.00858382	-0.0130008	-8.59703	6.39174
0.0782023	-0.0769174	-0.00543989	-0.00976643	-7.13872	6.22608
0.0763259	-0.0751273	-0.00200077	-0.00617502	-6.93699	6.04486
0.0742761	-0.073231	0.00164057	-0.00225479	-6.71678	-25.9946
0.0720585	-0.0717652	0.00445905	0.00198564	26.7172	-26.3891
0.0702334	-0.0709588	0.00601799	0.00547591	27.2215	-26.6073
0.0690885	-0.0708236	0.00629544	0.00766742	27.5382	-11.2707
0.0686317	-0.0711421	0.0057079	0.00854605	28.4107	-14.2383
0.0687483	-0.0718164	0.00444212	0.00833136	14.0234	-14.1951
0.0691948	-0.0728456	0.00249952	0.00748954	13.9921	-14.1288
0.069991	-0.074228	-0.000117633	0.00598205	13.9359	-3.03287
0.0711356	-0.0756088	-0.00273187	0.00381086	13.855	17.4858
0.0726265	-0.0765528	-0.00451157	0.000978793	13.7494	17.7615
0.0742092	-0.0770531	-0.00544428	-0.00202856	-16.7322	17.906
0.075374	-0.077081	-0.00547581	-0.0042371	-17.0545	5.45339
0.0761126	-0.0768341	-0.00498407	-0.00563231	-17.2582	6.20206
0.07642	-0.0764321	-0.00419808	-0.00620512	-19.8444	6.16064
0.0763662	-0.0758762	-0.00311945	-0.00608972	-6.18113	6.10381
0.0761517	-0.0751677	-0.00175038	-0.00566959	-6.9086	6.03167
0.0757644	-0.0743085	-9.36813e-05	-0.00492173	-6.86659	-4.82928
0.0752056	-0.0736551	0.00116904	-0.0038478	-6.80626	-25.9286
0.0744766	-0.0736561	0.00118032	-0.00245017	-6.72776	-14.0838
0.0735795	-0.0741145	0.000316926	-0.000731959	-6.63124	-14.0544
0.0727919	-0.0746647	-0.000721832	0.000776214	26.5425	17.1745
0.0726739	-0.0747605	-0.000891658	0.00100385	11.2085	5.20117
0.0730022	-0.074601	-0.000573402	0.00037787	13.727	5.96965
0.0734995	-0.0742988	1.75514e-05	-0.000571356	-16.5195	-4.82831
0.0736295	-0.0742056	0.000208725	-0.000818038	-5.87309	-11.0082
0.0735026	-0.0744019	-0.000153861	-0.000573399	-6.62233	17.0865
0.0732164	-0.074518	-0.000363013	-2.44978e-05	4.89557	20.16
0.0730729	-0.0744556	-0.00023101	0.000251606	11.1748	5.16482
0.073201	-0.0743299	2.21302e-05	7.94256e-06	-0.441728	-5.61565
0.0732667	-0.0743179	5.77748e-05	-0.000116172	-0.444512	0.00899495
0.0732147	-0.0743291	4.90635e-05	-1.53456e-05	5.66025	0.00878799
0.0731959	-0.07434	4.07955e-05	2.2112e-05	2.54929	0.00859157
0.0732294	-0.0743508	3.29577e-05	-4.03873e-05	-0.442563	0.00840537
0.0732772	-0.0743613	2.55375e-05	-0.000130368	-5.83291	0.00822909
0.0732395	-0.0743716	1.85228e-05	-5.69267e-05	5.66072	0.00806244
0.0732446	-0.0743817	1.19026e-05	-6.53304e-05	-0.443204	0.00790517
0.0732641	-0.0743917	5.66608e-06	-0.00010123	-0.444127	0.00775701
0.0732725	-0.0744014	-1.96688e-07	-0.000115935	-0.444505	0.00762707
0.0732952	-0.0744109	-5.69271e-06	-0.00015811	-19.0075	0.00775764
0.0732322	-0.0744203	-1.08204e-05	-3.63625e-05	5.66049	0.00787946
0.0732088	-0.0744294	-1.55762e-05	9.66114e-06	5.66018	0.00799244
0.0732506	-0.0744384	-1.99571e-05	-6.90941e-05	-0.443301	0.00809652
0.0732069	-0.0744471	-2.39601e-05	1.55689e-05	5.66025	0.00819162
0.0732186	-0.0744557	-2.75825e-05	-5.59414e-06	-0.441668	0.00827767
0.0732446	-0.074464	-3.0822e-05	-5.42345e-05	-0.442919	0.00835463
0.0732596	-0.0744722	-3.36763e-05	-8.17162e-05	-0.443625	0.00842244
0.0732635	-0.0744801	-3.61435e-05	-8.80181e-05	-0.443787	0.00848106
0.0732817	-0.0744878	-3.82221e-05	-0.000121797	-5.83241	0.00853044
0.0732145	-0.0744953	-3.99105e-05	7.84491e-06	5.66016	0.00857055
0.07319	-0.0745025	-4.12078e-05	5.56653e-05	-0.442956	0.00860137
0.0732283	-0.0745096	-4.2113e-05	-1.65477e-05	-0.44195	0.00862287
0.0732556	-0.0745274	-6.36111e-05	-6.76167e-05	-0.443263	0.0091336
0.0732717	-0.074545	-8.47022e-05	-9.75168e-05	-0.444032	0.00963466
0.0732768	-0.0745624	-0.000105372	-0.000106225	-0.444256	0.0101257
0.0731932	-0.0745794	-0.000125607	5.45931e-05	5.6607	0.0106064
0.0732622	-0.0745963	-0.000145394	-7.64772e-05	-0.443491	0.0110765
0.0733236	-0.0745043	4.29869e-05	-0.000193001	-5.83657	-5.61587
0.0732545	-0.0744846	9.29357e-05	-5.99902e-05	5.66076	0.00983026
0.0732536	-0.0745116	5.3684e-05	-5.74747e-05	-0.443002	0.00889776
0.0732924	-0.0745384	1.4883e-05	-0.000131094	-5.83295	0.00797597
0.0732459	-0.074565	-2.35261e-05	-4.12882e-05	5.66054	0.00818131
0.0732421	-0.0745913	-6.15549e-05	-3.33267e-05	-0.442381	0.00908475
0.0732526	-0.0746175	-9.91781e-05	-5.28627e-05	-0.442883	0.00997856
0.0732776	-0.0746434	-0.000136371	-9.98996e-05	-0.444093	0.0108621
0.0732943	-0.0745604	3.45983e-05	-0.000131424	-5.83297	-5.61578
0.0732257	-0.0745499	6.71434e-05	4.84777e-07	5.66008	0.00921751
0.0732252	-0.0745859	1.04557e-05	1.90753e-06	-0.441573	0.00787079
0.0732646	-0.0746218	-4.58371e-05	-7.28242e-05	-0.443397	0.00871134
0.0732928	-0.0746574	-0.000101735	-0.000126383	-5.83267	0.0100393
0.0732357	-0.0746928	-0.0001572	-1.65207e-05	5.66026	5.16076
0.0732213	-0.0746461	-5.56405e-05	1.15079e-05	-0.44182	-5.616
0.0732337	-0.0746481	-4.71495e-05	-1.17849e-05	-0.441827	0.00874252
0.0732729	-0.0746732	-8.31006e-05	-8.64356e-05	-0.443747	0.00959661
0.0733011	-0.0746981	-0.000118632	-0.000139903	-5.83346	0.0104407
0.0732438	-0.0747228	-0.000153719	-2.99272e-05	5.66042	5.16057
0.0732293	-0.0746653	-3.17844e-05	-1.78892e-06	-0.44157	-5.61575
0.0732416	-0.0746565	-2.9105e-06	-2.4989e-05	-0.442167	0.00769154
0.0732807	-0.0746709	-1.84717e-05	-9.95482e-05	-0.444084	0.00806123
0.0732058	-0.0746851	-3.36559e-05	4.40831e-05	5.66058	0.00842196
0.073183	-0.0746991	-4.84532e-05	8.79851e-05	-0.443787	0.00877349
0.073223	-0.0747128	-6.28535e-05	1.18805e-05	-0.44183	0.0091156
0.0732519	-0.0747264	-7.68473e-05	-4.30673e-05	-0.442632	0.00944805
0.0732697	-0.0747397	-9.04252e-05	-7.68648e-05	-0.443501	0.00977062
0.0732764	-0.0747527	-0.000103578	-8.94863e-05	-0.443825	0.0100831
0.0732975	-0.0747655	-0.000116297	-0.00012959	-19.0035	0.0103853
0.073233	-0.0747781	-0.000128575	-5.82171e-06	5.66014	0.0106769
0.0732204	-0.0747903	-0.000140401	1.83743e-05	-0.441997	0.0109579
0.0732347	-0.0748023	-0.00015177	-8.76299e-06	-0.441749	0.011228
0.073238	-0.0747055	4.50365e-05	-1.47742e-05	-0.441904	-5.61589
0.0732556	-0.074681	0.000103411	-4.82964e-05	-0.442766	0.0100791
0.0732621	-0.0747032	7.25992e-05	-6.06644e-05	-0.443084	0.00934713
0.0732831	-0.0747251	4.22681e-05	-0.000100529	-0.444109	0.00862656
0.0732958	-0.0747469	1.23696e-05	-0.000124881	-5.83259	0.00791626
0.0732232	-0.0747684	-1.71427e-05	1.41947e-05	5.66024	0.00802966
0.0732187	-0.0747897	-4.62789e-05	2.27828e-05	-0.44211	0.00872184
0.0732541	-0.0748108	-7.50196e-05	-4.47784e-05	-0.442676	0.00940463
0.0732783	-0.0748316	-0.000103346	-9.1188e-05	-0.443869	0.0100776
0.0732915	-0.0748523	-0.000131238	-0.000116411	-0.444518	0.0107402
0.0732385	-0.0748726	-0.000158679	-1.50655e-05	5.66025	5.16084
0.0732187	-0.0748108	-2.90882e-05	2.29109e-05	2.54928	-5.61572
0.073251	-0.0747977	7.44388e-06	-3.90687e-05	-0.442529	0.00779924
0.0732978	-0.0748078	-4.52431e-07	-0.000128529	-5.8328	0.00763315
0.0732591	-0.0748177	-7.98126e-06	-5.45709e-05	5.6607	0.00781201
0.0732631	-0.0748274	-1.51402e-05	-6.24577e-05	-0.44313	0.00798208
0.0732816	-0.0748369	-2.19244e-05	-9.78406e-05	-0.44404	0.00814326
0.0732889	-0.0748462	-2.83295e-05	-0.000112032	-0.444405	0.00829542
0.0733105	-0.0748553	-3.4351e-05	-0.000153695	-19.0069	0.00843847
0.0732465	-0.0748642	-3.99851e-05	-3.14427e-05	5.66043	0.00857232
0.073222	-0.0748728	-4.52279e-05	1.50861e-05	5.66025	0.00869687
0.0732627	-0.0748813	-5.00759e-05	-6.31575e-05	-0.443148	0.00881205
0.0733178	-0.0748895	-5.4526e-05	-0.000168879	-5.83516	0.00891776
0.073265	-0.0748975	-5.8575e-05	-6.81409e-05	5.66085	0.00901396
0.0732549	-0.0749053	-6.22204e-05	-4.92638e-05	-0.442791	0.00910056
0.0732591	-0.0749129	-6.54597e-05	-5.78874e-05	-0.443013	0.00917751
0.0732778	-0.0749202	-6.82907e-05	-9.4002e-05	-0.443941	0.00924477
0.0732853	-0.0749273	-7.07115e-05	-0.000108928	-0.444325	0.00930228
0.0733072	-0.0749341	-7.27206e-05	-0.000151327	-19.0065	0.00935001
0.0732434	-0.0749408	-7.43166e-05	-2.98151e-05	5.66041	0.00938793
0.0732191	-0.0749472	-7.54984e-05	1.59734e-05	5.66026	0.009416
0.0732601	-0.0749533	-7.62652e-05	-6.30096e-05	-0.443144	0.00943422
0.0733154	-0.0749702	-9.76065e-05	-0.00016947	-5.83519	0.00994122
0.0732627	-0.0749869	-0.000118518	-6.94698e-05	5.66086	0.010438
0.0732529	-0.0750032	-0.000138986	-5.1331e-05	-0.442844	0.0109243
0.0732574	-0.0750193	-0.000158997	-6.06927e-05	-0.443085	5.16086
0.0732762	-0.0749768	-6.68088e-05	-9.75441e-05	-0.444032	-5.61612
0.073284	-0.0749673	-3.80303e-05	-0.000113204	-0.444435	0.00852588
0.073306	-0.0750046	-9.85251e-05	-0.000156336	-19.0072	0.00996304
0.0732424	-0.0750415	-0.00015859	-3.55468e-05	5.66048	5.16083
0.0732184	-0.0749964	-6.16278e-05	9.51751e-06	5.66018	-5.61606
0.0732595	-0.0749999	-5.7734e-05	-7.01972e-05	-0.443329	0.00899398
0.0732153	-0.0750266	-9.82814e-05	1.35079e-05	5.66023	0.00995725
0.0732263	-0.075053	-0.000138399	-8.60951e-06	-0.441745	0.0109103
0.0732517	-0.0749706	2.9651e-05	-5.82051e-05	-0.443021	-5.61573
0.0732661	-0.0749606	5.92869e-05	-8.66389e-05	-0.443752	0.00903087
0.0732693	-0.0749972	-3.19065e-07	-9.38893e-05	-0.443938	0.00762998
0.0732869	-0.0750336	-5.95379e-05	-0.000128614	-5.8328	0.00903683
0.0732191	-0.0750698	-0.000118352	9.03283e-08	5.66008	0.0104341
0.073194	-0.0751058	-0.000176723	4.69704e-05	-0.442732	5.16183
0.0732316	-0.0750596	-7.80386e-05	-2.61905e-05	-0.442198	-5.61623
0.0732582	-0.075062	-7.24201e-05	-7.82076e-05	-0.443535	0.00934287
0.0732737	-0.0750877	-0.000111243	-0.000109048	-0.444328	0.0102652
0.0732781	-0.0751131	-0.000149627	-0.000118687	-0.444576	0.0111771
0.0731939	-0.0750296	2.01764e-05	4.12204e-05	5.66054	-5.61563
0.0731872	-0.0750185	5.15902e-05	5.27431e-05	-0.44288	0.00884802
0.0732203	-0.075054	-6.24553e-06	-1.18606e-05	-0.441829	0.00777077
0.0732424	-0.0750893	-6.36954e-05	-5.53232e-05	-0.442947	0.0091356
0.0732534	-0.0751244	-0.000120738	-7.76262e-05	-0.44352	0.0104908
0.0732533	-0.0751593	-0.000177336	-7.87527e-05	-0.443549	5.16187
0.0732676	-0.075112	-7.68762e-05	-0.00010736	-0.444285	-5.61622
0.0732707	-0.0751133	-6.94831e-05	-0.000114769	-0.444475	0.0092731
0.0731852	-0.0751379	-0.000106532	4.73622e-05	5.66061	0.0101533
0.0732523	-0.0751622	-0.000143144	-8.23719e-05	-0.443642	0.0110231
0.0733117	-0.0750776	2.84165e-05	-0.000197544	-5.83683	-5.61572
0.0732407	-0.0750654	6.15691e-05	-6.31735e-05	5.66079	0.00908509
0.0732378	-0.0750999	5.48329e-06	-5.92989e-05	-0.443049	0.00775267
0.0732747	-0.0751342	-5.02121e-05	-0.000131559	-5.83298	0.00881528
0.0732262	-0.0751682	-0.000105509	-4.03926e-05	5.66053	0.010129
0.0732205	-0.075202	-0.000160372	-3.10703e-05	-0.442323	5.16093
0.0732291	-0.0751537	-5.82042e-05	-4.92451e-05	-0.44279	-5.61603
0.0732521	-0.075154	-4.9105e-05	-9.49222e-05	-0.443965	0.00878898
0.0732669	-0.0751775	-8.44478e-05	-0.000125091	-5.8326	0.00962861
0.0731963	-0.0752008	-0.00011937	8.16674e-06	5.66017	0.0104582
0.0731939	-0.0752238	-0.000153847	1.09381e-05	-0.441805	5.16057
0.0732313	-0.0751647	-3.13028e-05	-6.24426e-05	-0.44313	-5.61575
0.0732577	-0.0751543	-1.81868e-06	-0.000114658	-0.444473	0.00766561
0.0731699	-0.075167	-1.67695e-05	5.13326e-05	5.66066	0.00802079
0.0732347	-0.0751796	-3.13445e-05	-7.45531e-05	-0.443441	0.00836705
0.0732919	-0.075192	-4.5534e-05	-0.000185899	-5.83615	0.00870414
0.0732187	-0.0752041	-5.93286e-05	-4.77198e-05	5.66062	0.00903186
0.0732136	-0.075216	-7.27189e-05	-4.003e-05	-0.442553	0.00934997
0.0732483	-0.0752277	-8.56962e-05	-0.000108482	-0.444314	0.00965827
0.073169	-0.0752392	-9.82517e-05	4.12691e-05	5.66054	0.00995655
0.0731672	-0.0752504	-0.000110377	4.26286e-05	-0.44262	0.0102446
0.0732052	-0.0752613	-0.000122064	-3.21524e-05	-0.442351	0.0105223
0.0732322	-0.075272	-0.000133305	-8.57894e-05	-0.44373	0.0107893
0.073248	-0.0752824	-0.000144093	-0.000118244	-0.444565	0.0110456
0.0731498	-0.0752925	-0.000154419	6.75044e-05	5.66084	5.1606
0.0732042	-0.075244	-5.25511e-05	-3.86688e-05	-0.442518	-5.61597
0.073251	-0.075289	-0.000129646	-0.000130404	-5.83291	0.0107024
0.0732383	-0.0752519	-4.96798e-05	-0.000108243	5.66131	-5.61594
0.0732204	-0.0752668	-6.94719e-05	-7.62696e-05	5.66094	0.00927283
0.0731973	-0.075305	-0.000133702	-3.45162e-05	5.66047	0.0107987
0.0732171	-0.0752344	1.0241e-05	-7.46162e-05	-0.443443	-5.61553
0.0732512	-0.0752361	1.58007e-05	-0.000142207	-5.8336	0.00799777
0.0731998	-0.0752845	-6.79144e-05	-4.63527e-05	5.6606	0.00923583
0.0731912	-0.0753326	-0.00015122	-3.23434e-05	-0.442356	0.0112149
0.073197	-0.0752719	-2.63078e-05	-4.58334e-05	-0.442703	-5.61569
0.0732171	-0.07526	5.1232e-06	-8.68266e-05	-0.443757	0.00774411
0.0732291	-0.0752713	-7.87685e-06	-0.000112318	-0.444412	0.00780953
0.07323	-0.0752825	-2.05071e-05	-0.000116606	-0.444523	0.00810958
0.0731422	-0.0752934	-3.2759e-05	4.86465e-05	5.66063	0.00840065
0.073207	-0.0753042	-4.46245e-05	-7.79691e-05	-0.443529	0.00868254
0.0732642	-0.0753147	-5.60957e-05	-0.000190036	-5.83639	0.00895506
0.0731909	-0.075325	-6.71649e-05	-5.25705e-05	5.66067	0.00921802
0.0731859	-0.075335	-7.78246e-05	-4.55967e-05	-0.442697	0.00947127
0.0732205	-0.0753449	-8.80678e-05	-0.000114763	-0.444475	0.00971461
0.0731412	-0.0753544	-9.78877e-05	3.42868e-05	5.66046	0.0099479
0.0731264	-0.0753638	-0.000107278	5.97748e-05	-0.443061	0.010171
0.0731384	-0.0753729	-0.000116231	3.39828e-05	-0.442398	0.0103837
0.0731393	-0.0753817	-0.000124743	2.93703e-05	-0.442279	0.0105859
0.0731547	-0.0753902	-0.000132807	-2.73458e-06	-0.441594	0.0107775
0.073159	-0.0753985	-0.000140417	-1.37111e-05	-0.441877	0.0109583
0.0731647	-0.0754065	-0.000147569	-2.74026e-05	-0.442229	0.0111282
0.0731847	-0.0754143	-0.000154259	-6.86059e-05	-0.443288	5.1606
0.0731967	-0.0753633	-4.87521e-05	-9.43204e-05	-0.44395	-5.61593
0.0731976	-0.0754059	-0.000122208	-9.88456e-05	-0.444066	0.0105257
0.0732128	-0.0753664	-3.86166e-05	-0.000130843	-5.83293	-5.61582
0.0731425	-0.075379	-5.48062e-05	5.92532e-07	5.66008	0.00892442
0.0731405	-0.0754149	-0.000115434	1.54186e-06	-0.441564	0.0103648
0.0731782	-0.0754504	-0.000175621	-7.36633e-05	-0.443418	5.16177
0.0732049	-0.0754039	-7.87533e-05	-0.000127695	-5.83275	-5.61624
0.0731461	-0.075406	-7.49523e-05	-1.83034e-05	5.66028	0.00940303
0.0731301	-0.0754313	-0.000115592	9.25375e-06	-0.441762	0.0103685
0.073141	-0.0754563	-0.00015579	-1.45136e-05	-0.441897	5.16068
0.0731786	-0.0753992	-3.89638e-05	-8.96393e-05	-0.443829	-5.61583
0.0731501	-0.0753908	-1.5201e-05	-3.82184e-05	5.66051	0.00798353
0.0731548	-0.0754055	-3.5876e-05	-5.01868e-05	-0.442815	0.0084747
0.0731737	-0.0754201	-5.61626e-05	-8.96512e-05	-0.443829	0.00895664
0.0731816	-0.0754344	-7.60471e-05	-0.00010793	-0.4443	0.00942904
0.0732039	-0.0754485	-9.55162e-05	-0.000153684	-19.0069	0.00989156
0.0731404	-0.0754624	-0.000114557	-3.5521e-05	5.66048	0.0103439
0.0731165	-0.075476	-0.000133157	6.91613e-06	5.66015	0.0107858
0.0731578	-0.0754893	-0.000151303	-7.54288e-05	-0.443464	0.0112169
0.0731137	-0.0753938	3.87283e-05	5.65282e-06	5.66014	-5.61582
0.0731249	-0.0753707	9.03392e-05	-1.90747e-05	-0.442015	0.00976857
0.0731504	-0.0753941	5.27472e-05	-7.12831e-05	-0.443357	0.00887551
0.0731649	-0.0754174	1.56046e-05	-0.00010232	-0.444155	0.00799312
0.0731683	-0.0754405	-2.11462e-05	-0.000112161	-0.444408	0.00812477
0.0731179	-0.0754633	-5.75184e-05	-1.92948e-05	5.66029	0.00898885
0.0731007	-0.075486	-9.34875e-05	1.01992e-05	-0.441786	0.00984337
0.0731233	-0.0755084	-0.00012903	-3.64286e-05	-0.442461	0.0106877
0.0731378	-0.0755305	-0.000164121	-6.75867e-05	-0.443262	5.16114
0.0731412	-0.0754705	-4.21741e-05	-7.75759e-05	-0.443519	-5.61586
0.0731459	-0.0754591	-1.32905e-05	-9.02406e-05	-0.443845	0.00793814
0.073165	-0.075471	-2.88457e-05	-0.000130388	-19.0036	0.00830768
0.0730985	-0.0754827	-4.40171e-05	-6.66048e-06	5.66015	0.00866811
0.073084	-0.0754941	-5.87945e-05	1.7494e-05	-0.441974	0.00901917
0.0730963	-0.0755053	-7.31681e-05	-9.68565e-06	-0.441773	0.00936064
0.0730976	-0.0755163	-8.71284e-05	-1.57389e-05	-0.441929	0.00969229
0.0731132	-0.075527	-0.000100666	-4.93027e-05	-0.442792	0.0100139
0.0731178	-0.0755375	-0.000113772	-6.17116e-05	-0.443111	0.0103253
0.0731367	-0.0755477	-0.000126437	-0.000101616	-0.444137	0.0106261
0.0731475	-0.0755577	-0.000138653	-0.000126008	-5.83265	0.0109164
0.0730729	-0.0755674	-0.000150412	1.30293e-05	5.66022	0.0111957
0.0730665	-0.0754683	4.60011e-05	2.15792e-05	-0.442079	-5.6159
0.0730998	-0.0754415	0.00010398	-4.60205e-05	-0.442707	0.0100926
0.0731221	-0.0754613	7.27729e-05	-9.24678e-05	-0.443902	0.00935125
0.0731333	-0.0754809	4.2047e-05	-0.000117727	-0.444552	0.0086213
0.0730784	-0.0755004	1.17531e-05	-1.64168e-05	5.66026	0.00790162
0.0730565	-0.0755196	-1.81547e-05	2.15253e-05	2.54929	0.0080537
0.0730869	-0.0755386	-4.76859e-05	-4.04903e-05	-0.442565	0.00875527
0.0731317	-0.0755573	-7.68207e-05	-0.000129988	-5.83288	0.00944742
0.073091	-0.0755759	-0.00010554	-5.60633e-05	5.66071	0.0101297
0.073093	-0.0755942	-0.000133823	-6.39841e-05	-0.443169	0.0108016
0.0731095	-0.0756122	-0.000161653	-9.94009e-05	-0.44408	5.161
0.0731148	-0.0755481	-3.24479e-05	-0.000113625	-0.444446	-5.61576
0.0731345	-0.0755327	3.69836e-06	-0.00015532	-19.0071	0.00771026
0.0730684	-0.0755405	-4.58909e-06	-3.30967e-05	5.66045	0.00773142
0.073042	-0.075548	-1.25089e-05	1.34028e-05	5.66023	0.00791957
0.0730807	-0.0755554	-2.00558e-05	-6.48722e-05	-0.443192	0.00809886
0.0730819	-0.0755626	-2.72247e-05	-7.1359e-05	-0.443359	0.00826917
0.0731046	-0.0755696	-3.40109e-05	-0.000118965	-0.444583	0.00843039
0.0730162	-0.0755763	-4.04098e-05	4.59632e-05	5.6606	0.00858241
0.0730803	-0.0755829	-4.64172e-05	-8.09688e-05	-0.443606	0.00872513
0.0731368	-0.0755892	-5.2029e-05	-0.000193343	-5.83659	0.00885844
0.0730629	-0.0755953	-5.72415e-05	-5.61811e-05	5.66071	0.00898228
0.0730571	-0.0756012	-6.20512e-05	-4.95114e-05	-0.442797	0.00909654
0.0730911	-0.0756069	-6.6455e-05	-0.000118981	-0.444584	0.00920116
0.073011	-0.0756123	-7.04498e-05	2.97749e-05	5.66041	0.00929606
0.0729956	-0.0756175	-7.4033e-05	5.49787e-05	-0.442938	0.00938119
0.0730069	-0.0756224	-7.72022e-05	2.88964e-05	-0.442267	0.00945648
0.0730071	-0.0756272	-7.99553e-05	2.39849e-05	-0.442141	0.00952188
0.0730218	-0.0756316	-8.22904e-05	-8.42641e-06	-0.441741	0.00957736
0.0730254	-0.0756359	-8.42061e-05	-1.97096e-05	-0.442031	0.00962287
0.0730304	-0.0756399	-8.5701e-05	-3.37041e-05	-0.442391	0.00965838
0.0730498	-0.0756437	-8.67741e-05	-7.52075e-05	-0.443458	0.00968388
0.0730611	-0.0756581	-0.000108418	-0.000101217	-0.444127	0.0101981
0.0730612	-0.0756943	-0.000171614	-0.000106033	-0.444251	5.16155
0.0729728	-0.0756484	-7.77635e-05	5.86763e-05	5.66074	-5.61623
0.0730369	-0.0756511	-7.69789e-05	-6.85151e-05	-0.443286	0.00945118
0.0730934	-0.075677	-0.000120635	-0.000181182	-5.83588	0.0104883
0.0730194	-0.0757026	-0.000163846	-4.43332e-05	5.66058	5.16112
0.0730136	-0.0756461	-5.00194e-05	-3.79725e-05	-0.442501	-5.61594
0.0730477	-0.0756383	-2.92603e-05	-0.000107755	-0.444295	0.00831753
0.0729676	-0.0756537	-5.29433e-05	4.06667e-05	5.66054	0.00888016
0.0729522	-0.0756688	-7.62263e-05	6.55106e-05	-0.443209	0.0094333
0.0729635	-0.0756837	-9.90939e-05	3.90816e-05	-0.442529	0.00997656
0.0729638	-0.0756984	-0.000121531	3.38408e-05	-0.442394	0.0105096
0.0729785	-0.0757128	-0.000143522	1.11391e-06	-0.441553	0.011032
0.0729821	-0.0756184	4.26524e-05	-1.04833e-05	-0.441794	-5.61586
0.0730002	-0.0755963	9.03938e-05	-4.95998e-05	-0.4428	0.00976987
0.0730101	-0.0756209	4.89313e-05	-7.32417e-05	-0.443408	0.00878485
0.0730089	-0.0756452	7.91205e-06	-7.57104e-05	-0.443471	0.00781037
0.0730221	-0.0756694	-3.27204e-05	-0.000105662	-0.444241	0.00839973
0.0730241	-0.0756933	-7.29665e-05	-0.000114415	-0.444466	0.00935585
0.0729376	-0.075717	-0.000112799	4.63713e-05	5.6606	0.0103022
0.0729285	-0.0757405	-0.000152192	5.87606e-05	-0.443035	0.011238
0.0729593	-0.0756551	1.6607e-05	-4.96959e-06	-0.441652	-5.61559
0.0729791	-0.075642	4.70251e-05	-4.75586e-05	-0.442747	0.00873957
0.0729878	-0.0756756	-1.18114e-05	-6.8994e-05	-0.443298	0.007903
0.0729978	-0.075709	-7.02621e-05	-9.31141e-05	5.66113	0.0092916
0.0729898	-0.0757422	-0.000128301	-8.26437e-05	5.66101	0.0106704
0.0729766	-0.0756665	2.18182e-05	-6.23889e-05	5.66078	-5.61565
0.0730062	-0.0756632	3.35305e-05	-0.00012399	-19.0028	0.00841898
0.0729758	-0.0757065	-4.40272e-05	-7.082e-05	5.66088	0.00866835
0.0729881	-0.0757496	-0.000121191	-9.94848e-05	-0.444082	0.0105015
0.0729118	-0.0756839	9.80221e-06	4.13592e-05	5.66055	-5.61552
0.0728877	-0.0756671	4.72508e-05	8.24776e-05	-0.443645	0.00874493
0.0729262	-0.0756735	4.03296e-05	3.58426e-06	-0.441616	0.0085805
0.0729538	-0.0756797	3.38378e-05	-5.41583e-05	-0.442917	0.00842628
0.0729702	-0.0756857	2.77649e-05	-9.07422e-05	-0.443858	0.00828201
0.0729756	-0.0756915	2.21013e-05	-0.000106139	-0.444254	0.00814746
0.0729953	-0.075697	1.68378e-05	-0.000149012	-19.0062	0.00802241
0.0729293	-0.0757024	1.1966e-05	-2.79772e-05	5.66039	0.00790667
0.0729029	-0.0757075	7.478e-06	1.73342e-05	5.66027	0.00780005
0.0729417	-0.0757125	3.36666e-06	-6.21242e-05	-0.443122	0.00770238
0.0729949	-0.0757173	-3.7463e-07	-0.000169059	-5.83517	0.0076313
0.0729401	-0.0757219	-3.75e-06	-6.95352e-05	5.66087	0.00771149
0.072928	-0.0757263	-6.7583e-06	-5.18723e-05	-0.442858	0.00778296
0.0729304	-0.0757305	-9.39752e-06	-6.17098e-05	-0.443111	0.00784566
0.0729341	-0.0757345	-1.16659e-05	-7.42326e-05	-0.443433	0.00789954
0.0729522	-0.0757383	-1.35619e-05	-0.000114245	-0.444462	0.00794459
0.0728592	-0.0757419	-1.50843e-05	5.82614e-05	5.66074	0.00798075
0.0729187	-0.0757453	-1.6232e-05	-6.11282e-05	-0.443096	0.00800802
